# Supplementary material
Source: PubMed Central journal article supplement (PMC4205208)
Supplement: NIHMS579606-supplement-01.pdf [file NIHMS579606-supplement-01.pdf]

|                                                                                                                               | N (N=600) | %    |
|-------------------------------------------------------------------------------------------------------------------------------|-----------|------|
| <b>Antibacterials</b>                                                                                                         |           |      |
| <i>Extended spectrum beta-lactam antibiotics<br/>(piperacillin-tazobactam, ampicillin sulbactam, ticarcillin-clavulanate)</i> | 283       | 47.2 |
| <i>Vancomycin</i>                                                                                                             | 235       | 39.2 |
| <i>Fluoroquinolones<br/>(Levoquin, Ciprofloxacin, Moxifloxacin, Gatifloxacin)</i>                                             | 160       | 26.7 |
| <i>Cephalosporin (3<sup>rd</sup> or 4<sup>th</sup> generation)</i>                                                            | 121       | 20.2 |
| <i>Metronidazole</i>                                                                                                          | 53        | 8.8  |
| <i>Carbapenems</i>                                                                                                            | 30        | 5.0  |
| <i>Septa/Bactrim</i>                                                                                                          | 24        | 4.0  |
| <i>Aminoglycosides</i>                                                                                                        | 19        | 3.2  |
| <i>1<sup>st</sup> generation Cephalosporin</i>                                                                                | 13        | 2.2  |
| <i>Astreonam</i>                                                                                                              | 9         | 1.5  |
| <i>Doxycycline</i>                                                                                                            | 9         | 1.5  |
| <i>Clindamycin</i>                                                                                                            | 8         | 1.3  |
| <i>Ampicillin</i>                                                                                                             | 7         | 1.2  |
| <i>Linezolid</i>                                                                                                              | 3         | 0.5  |
| <b>Antifungals</b>                                                                                                            |           |      |
| <i>Fluconazole</i>                                                                                                            | 116       | 19.3 |
| <i>Amphotericin B</i>                                                                                                         | 47        | 7.8  |
| <i>Caspofungin/Micafungin</i>                                                                                                 | 11        | 1.8  |

**Supplementary file #1.** Table of antimicrobial and antifungal prophylaxis for 600 ALF patients.

**Supplementary File #2**  
**Prophylaxis, Death, and Blood Infection Rates by US ALFSG Site (Row Percentages).**

|                      | Prophylaxis |       | Dead  |       | Blood Infection |       | Total |        |
|----------------------|-------------|-------|-------|-------|-----------------|-------|-------|--------|
|                      | N           | %     | N     | %     | N               | %     | N     | %      |
| <b>Total</b>         | 600         | 38.7% | 467   | 30.1% | 226             | 14.6% | 1551  | 100.0% |
| <b>Center Number</b> |             |       |       |       |                 |       |       |        |
| <b>10</b>            | 20/59       | 33.9% | 29/59 | 49.2% | 13/59           | 22.0% | 59    | 100.0% |
| <b>11</b>            | 8           | 7.8%  | 34    | 33.3% | 14              | 13.7% | 102   | 100.0% |
| <b>12</b>            | 2           | 9.5%  | 6     | 28.6% | 2               | 9.5%  | 21    | 100.0% |
| <b>13</b>            | 118         | 58.1% | 41    | 20.2% | 24              | 11.8% | 203   | 100.0% |
| <b>14</b>            | 21          | 36.8% | 20    | 35.1% | 9               | 15.8% | 57    | 100.0% |
| <b>15</b>            | 11          | 18.0% | 20    | 32.8% | 19              | 31.1% | 61    | 100.0% |
| <b>16</b>            | 27          | 50.0% | 10    | 18.5% | 3               | 5.6%  | 54    | 100.0% |
| <b>17</b>            | 26          | 53.1% | 20    | 40.8% | 3               | 6.1%  | 49    | 100.0% |
| <b>18</b>            | 45          | 56.3% | 23    | 28.8% | 10              | 12.5% | 80    | 100.0% |
| <b>19</b>            | 8           | 17.8% | 17    | 37.8% | 10              | 22.2% | 45    | 100.0% |
| <b>20</b>            | 19          | 47.5% | 15    | 37.5% | 7               | 17.5% | 40    | 100.0% |
| <b>21</b>            | 23          | 24.7% | 21    | 22.6% | 14              | 15.1% | 93    | 100.0% |
| <b>22</b>            | 1           | 9.1%  | 3     | 27.3% | 2               | 18.2% | 11    | 100.0% |
| <b>23</b>            | 74          | 40.7% | 59    | 32.4% | 34              | 18.7% | 182   | 100.0% |
| <b>24</b>            | 0           | 0.0%  | 0     | 0.0%  | 0               | 0.0%  | 4     | 100.0% |
| <b>25</b>            | 33          | 48.5% | 27    | 39.7% | 5               | 7.4%  | 68    | 100.0% |
| <b>27</b>            | 8           | 21.6% | 10    | 27.0% | 4               | 10.8% | 37    | 100.0% |
| <b>30</b>            | 1           | 25.0% | 0     | 0.0%  | 1               | 25.0% | 4     | 100.0% |
| <b>31</b>            | 7           | 18.9% | 6     | 16.2% | 3               | 8.1%  | 37    | 100.0% |
| <b>33</b>            | 6           | 54.5% | 3     | 27.3% | 4               | 36.4% | 11    | 100.0% |
| <b>34</b>            | 16          | 36.4% | 11    | 25.0% | 9               | 20.5% | 44    | 100.0% |
| <b>35</b>            | 14          | 29.8% | 16    | 34.0% | 4               | 8.5%  | 47    | 100.0% |
| <b>36</b>            | 3           | 12.0% | 7     | 28.0% | 2               | 8.0%  | 25    | 100.0% |
| <b>37</b>            | 51          | 46.8% | 41    | 37.6% | 10              | 9.2%  | 109   | 100.0% |
| <b>38</b>            | 22          | 36.7% | 17    | 28.3% | 14              | 23.3% | 60    | 100.0% |
| <b>43</b>            | 17          | 65.4% | 3     | 11.5% | 4               | 15.4% | 26    | 100.0% |
| <b>45</b>            | 7           | 77.8% | 6     | 66.7% | 2               | 22.2% | 9     | 100.0% |
| <b>46</b>            | 12          | 92.3% | 2     | 15.4% | 0               | 0.0%  | 13    | 100.0% |

- Number of patients enrolled at that particular site who were placed on antimicrobial prophylaxis (and percentage)
  - E.g. 20/59 (33.9%) of patients at center 10 were placed on prophylactic antibiotics
- Number of patients deceased per enrolling site
  - e.g. 13/59 ~ 49.2% at site 10
- Number of patients with BSI per site (e.g. 13/59 ~ 22% at site 10)

| URINE       |                  | Urine Infection (N=258) | No Urine Infection (N=1293) | p-value |
|-------------|------------------|-------------------------|-----------------------------|---------|
| Outcomes*** |                  |                         |                             |         |
|             | Liver Transplant | 62 (24.0%)              | 311 (24.1%)                 | 0.9941  |
|             | Alive at 21 days | 184 (71.3%)             | 900 (69.6%)                 | 0.5841  |

| TRACHEAL/SPUTUM |                  | Trach Infection (N=223) | No Trach Infection (N=1328) | p-value |
|-----------------|------------------|-------------------------|-----------------------------|---------|
| Outcomes***     |                  |                         |                             |         |
|                 | Liver Transplant | 38 (17.0%)              | 335 (25.2%)                 | 0.0081  |
|                 | Alive at 21 days | 154 (69.1%)             | 930 (70.0%)                 | 0.7697  |

| BLOODSTREAM |                  | BSI (N=226) | No BSI (N=1325) | p-value |
|-------------|------------------|-------------|-----------------|---------|
| Outcomes*** |                  |             |                 |         |
|             | Liver Transplant | 43 (19.0%)  | 330 (24.9%)     | 0.06    |
|             | Alive at 21 days | 134 (59.3%) | 950 (71.7%)     | 0.0002  |

| ANY INFECTION (Urine, Tracheal or blood) |                  | Any Infection* (N=531) | No Infection (N=1020) | p-value |
|------------------------------------------|------------------|------------------------|-----------------------|---------|
| Outcomes***                              |                  |                        |                       |         |
|                                          | Liver Transplant | 120 (22.6%)            | 253 (24.8%)           | 0.3350  |
|                                          | Alive at 21 days | 357 (67.2%)            | 727 (71.3%)           | 0.0996  |

### Supplementary File #3. Transplant and 21-day survival status by site of infection

\*Any infection is bloodstream, tracheal, or urine.

\*\*\*21-day post-enrollment
